# Supplementary material for: Was Hupehsuchus a baleen whale-style filter feeder in the Early Triassic? A re-examination of the evidence
Source: PeerJ. 2025 Jul 4;13:e19666. doi: 10.7717/peerj.19666 (PMC12232927; doi:10.7717/peerj.19666)
Supplement: Supplemental Information 6 [file peerj-13-19666-s006.xlsx]

## Sheet: Sheet1
Supplemental Table S1. 3D models of cetacean crania used in the current study.
3D models used forlLandmarking
Clade1	Clade2	Family	Genus	Species	Institution	Specimen#		URL
Cetacea	Mysticeti	Balaenidae	Balaena	mysticetus	Natural History Museum, London	NHMUK 1986.116		https://sketchfab.com/3d-models/bowhead-whale-cranium-b31f9723d5d34833b6a7a4e1c6bd0130
Cetacea	Mysticeti	Balaenidae	Eubalaena	australis	Natural History Museum, London	NHMUK 1873.3.3.1		https://sketchfab.com/3d-models/southern-right-whale-cranium-e2b3e9530ab44cee8aaa745ec9af3b1c
Cetacea	Mysticeti	Balaenidae	Eubalaena	glacialis	Museo di Storia Naturale e del Territorio, Università di Pisa	MSNTUP C-264		https://www.phenome10k.org/eubalaena-glacialis/
Cetacea	Mysticeti	Balaenopteridae	Balaenoptera	acutorostrata	Natural History Museum, London	NHMUK 1965.11.2.1		https://sketchfab.com/3d-models/minke-whale-cranium-b6fa1bf5ad43447894f7ecdef0997669
Cetacea	Mysticeti	Balaenopteridae	Balaenoptera	borealis	Natural History Museum, London	NHMUK C.1934.5.25.1		https://sketchfab.com/3d-models/sei-whale-cranium-d650c57ebad74f648363adc193f35a97
Cetacea	Mysticeti	Balaenopteridae	Balaenoptera	edeni	Natural History Museum, London	NHMUK C.1920.12.31.1		https://sketchfab.com/3d-models/brydes-whale-cranium-e2ac94b2c11b4875a7ca264096b628a8
Cetacea	Mysticeti	Balaenopteridae	Balaenoptera	musculus	Natural History Museum, London	NHMUK 1892.3.1.1		https://www.phenome10k.org/balaenoptera-musculus/
Cetacea	Mysticeti	Balaenopteridae	Balaenoptera	physalus	Natural History Museum, London	NHMUK 1862.7.18.1		https://sketchfab.com/3d-models/fin-whale-cranium-6caf313f8a554adeada37c350e0bcbc1
Cetacea	Mysticeti	Balaenopteridae	Megaptera	novaeangliae	Glacier Bay National Park	P12PS00972		https://www.morphosource.org/concern/biological_specimens/0000S5144?locale=en
Cetacea	Mysticeti	Cetotheridae	Caperea	marginata	Natural History Museum, London	NHMUK 1876.2.16.1		https://sketchfab.com/3d-models/pygmy-right-whale-cranium-846da79b9fb047ae9ecc302d2a15f293
Cetacea	Mysticeti	Eachrichtidae	Eschrichtius	robustus	National Museum of Natural History	USNM_13803		https://www.phenome10k.org/eschrichtius-robustus/
Cetacea	Odontoceti	Delphinidae	Cephalorhynchus	commersonii	National Museum of Natural History	USNM 550156		https://www.phenome10k.org/cephalorhynchus-commersonii-2/
Cetacea	Odontoceti	Delphinidae	Cephalorhynchus	eutropia	Natural History Museum, London	NHMUK 1881.8.17.1		https://www.phenome10k.org/cephalorhynchus-eutropia/
Cetacea	Odontoceti	Delphinidae	Cephalorhynchus	heavisidii	Natural History Museum, London	NHMUK 1948.7.27.1		https://www.phenome10k.org/cephalorhynchus-heavisidii/
Cetacea	Odontoceti	Delphinidae	Delphinus	delphis	Museums Victoria	NMV_C_24941	d	https://www.morphosource.org/concern/parent/000479856/media/000479859
Cetacea	Odontoceti	Delphinidae	Feresa	attenuata	Storia Naturale e del Territorio, Università di Pisa	USNM 504917		https://www.phenome10k.org/feresa-attenuata-3/
Cetacea	Odontoceti	Delphinidae	Globicephala	macrorhynchus	National Museum of Natural History	USNM_500239		https://www.morphosource.org/concern/parent/000479657/media/000479660
Cetacea	Odontoceti	Delphinidae	Globicephala	melas	Museums Victoria	NMV_C_29458		https://www.morphosource.org/concern/parent/000480341/media/000480344
Cetacea	Odontoceti	Delphinidae	Grampus	griseus	National Museum of Natural History	USNM 500271		https://www.phenome10k.org/grampus-griseus-2/
Cetacea	Odontoceti	Delphinidae	Lagenorhynchus	acutus	Natural Histroy Museum, Los Angeles	LACM 85994		https://www.morphosource.org/concern/media/000480308?locale=en
Cetacea	Odontoceti	Delphinidae	Lagenorhynchus	albirostris	American Museum of Natural History	AMNH 37162	d	https://www.morphosource.org/concern/media/000474999?locale=en
Cetacea	Odontoceti	Delphinidae	Lagenorhynchus	australis	National Museum of Natural History	USNM 395344		https://www.morphosource.org/concern/parent/000480410/media/000480413
Cetacea	Odontoceti	Delphinidae	Lagenorhynchus	cruciger	South Australian Museum	SAM_M_15715		https://www.morphosource.org/concern/parent/000480348/media/000480354
Cetacea	Odontoceti	Delphinidae	Lagenorhynchus	obliquidens	National Museum of Natural History	USNM_290642	d	https://www.morphosource.org/concern/parent/000479671/media/000479678
Cetacea	Odontoceti	Delphinidae	Lagenorhynchus	obscurus	Natural History Museum, London	NHMUK 1846.3.11.8		https://www.phenome10k.org/lagenorhynchus-obscurus/
Cetacea	Odontoceti	Delphinidae	Lissodelphis	borealis	National Museum of Natural History	USNM 550188		https://www.phenome10k.org/lissodelphis-borealis-3/
Cetacea	Odontoceti	Delphinidae	Lissodelphis	peronii	South Australian Museum	SAM_M_23161	d	https://www.morphosource.org/concern/parent/000480349/media/000480355
Cetacea	Odontoceti	Delphinidae	Orcaella	brevirostris	Natural History Museum, London	NHMUK 1883.11.20.2		https://www.phenome10k.org/orcaella-brevirostris/
Cetacea	Odontoceti	Delphinidae	Orcaella	heinsohni	National Museum of Natural History	USNM_284430		https://www.morphosource.org/concern/parent/000480399/media/000480404
Cetacea	Odontoceti	Delphinidae	Orcinus	orca	Australian Museum	AM_M_22839		https://www.morphosource.org/concern/parent/000480364/media/000480367
Cetacea	Odontoceti	Delphinidae	Peponocephala	electra	National Museum of Natural History	USNM 504511		https://www.phenome10k.org/peponocephala-electra/
Cetacea	Odontoceti	Delphinidae	Pseudorca	crassidens	Zoological Museum (Copenhagen, Denmark)			https://sketchfab.com/3d-models/false-killer-whale-skull-bf444b83934243b4be0c8ddaa7b397f4
Cetacea	Odontoceti	Delphinidae	Sotalia	fluviatilis	Natural Histroy Museum, Los Angeles	LACM_49708		https://www.morphosource.org/concern/parent/000480328/media/000480336
Cetacea	Odontoceti	Delphinidae	Sousa	chinensis	Natural Histroy Museum, Los Angeles	LACM_72168		https://www.morphosource.org/concern/parent/000480327/media/000480335
Cetacea	Odontoceti	Delphinidae	Sousa	plumbea	National Museum of Natural History	USNM 550941		https://www.morphosource.org/concern/parent/000479826/media/000479829
Cetacea	Odontoceti	Delphinidae	Sousa	sahulensis	Natural History Museum, London	NHM.1992.92		https://www.morphosource.org/concern/parent/000480386/media/000480389
Cetacea	Odontoceti	Delphinidae	Sousa	teuszii	Natural History Museum, London	NHMUK 1992.138		https://www.phenome10k.org/sousa-teuszii/
Cetacea	Odontoceti	Delphinidae	Stenella	attenuata	University of Floria Museum of Natural History	FLMNH 23327		https://www.morphosource.org/concern/media/000362457?locale=en
Cetacea	Odontoceti	Delphinidae	Stenella	coeruleoalba	San Diego Natural History Museum	SDNHM 13958		https://www.phenome10k.org/stenella-coeruleoalba-2/
Cetacea	Odontoceti	Delphinidae	Steno	bredanensis	National Museum of Natural History	USNM 572789		https://www.phenome10k.org/steno-bredanensis/
Cetacea	Odontoceti	Delphinidae	Tursiops	aduncus	South Australian Museum	SAMA 24839		https://www.morphosource.org/concern/parent/000480359/media/000480362
Cetacea	Odontoceti	Delphinidae	Tursiops	truncatus	The Charleston Museum	ChM CM256	d	https://sketchfab.com/3d-models/chm-cm256-bottlenose-dolphin-skull-0e199ac3f13f4543a779ccb446d765da
Cetacea	Odontoceti	Iniidae	Inia	geoffrensis	National Museum of Natural History	USNM 239667		https://www.phenome10k.org/inia-geoffrensis-2/
Cetacea	Odontoceti	Monodontidae	Delphinapterus	leucas	National Museum of Natural History	USNM 305071		https://www.phenome10k.org/delphinapterus-leucas-5/
Cetacea	Odontoceti	Monodontidae	Monodon	monoceros	Musuems Victoria	NMV C10360		https://www.morphosource.org/concern/parent/000479876/media/000479879
Cetacea	Odontoceti	Phocoenidae	Neophocaena	asiaeorientalis	National Museum of Natural History	USNM_23		https://www.morphosource.org/concern/parent/000480400/media/000480406
Cetacea	Odontoceti	Phocoenidae	Phocoena	dioptrica	Natural History Museum, London	NHMUK 1939.9.30.1		https://www.phenome10k.org/phocoena-dioptrica/
Cetacea	Odontoceti	Phocoenidae	Phocoena	phocoena	Musuems Victoria	NMV C24749		https://www.morphosource.org/concern/parent/000479881/media/000479886
Cetacea	Odontoceti	Phocoenidae	Phocoena	sinus	San Diego Natural History Museum	SDNHM 20697		https://www.phenome10k.org/phocoena-sinus/
Cetacea	Odontoceti	Phocoenidae	Phocoena	spinipinnis	Museo Nacional de Historia Natural de Chile	1623		https://sketchfab.com/3d-models/phocoena-spinipinnis-1623-3abb970a21d84932bce3f676c043be7c
Cetacea	Odontoceti	Phocoenidae	Phocoenoides	dalli	Natural Histroy Museum, Los Angeles	LACM_72580		https://www.morphosource.org/concern/parent/000480313/media/000480325
Cetacea	Odontoceti	Platanistidae	Platanista	gangetica	Zoological Museum of Copenhagen University			https://sketchfab.com/3d-models/platanista-skull-d5dcba15573b4eff93ca5515202bfe2e
Cetacea	Odontoceti	Pontoporiidae	Pontoporia	blainvillei	University of Floria Museum of Natural History	FLMNH 18781		https://www.morphosource.org/concern/parent/000361136/media/000361139
Cetacea	Odontoceti	Ziphiidae	Berardius	arnuxii	Natural History Museum, London	NHMUK 1935.10.23.1		https://www.phenome10k.org/berardius-arnuxii/
Cetacea	Odontoceti	Ziphiidae	Berardius	bairdii	University of Alaska, Museum of the North	UAM-11647		https://sketchfab.com/3d-models/uam-11647-bairds-beaked-whale-5c6d257dbd3a48748679e87ed60f5c85
Cetacea	Odontoceti	Ziphiidae	Hyperoodon	ampullatus	Natural History Museum, London	NHMUK ZD 1992.42		https://sketchfab.com/3d-models/northern-bottlenose-whale-cranium-03b96078b1714569855c53ec5724d6b9
Cetacea	Odontoceti	Ziphiidae	Hyperoodon	planifrons	Natural History Museum, London	NHMUK 1952.9.30.1		https://www.phenome10k.org/hyperoodon-planifrons/
Cetacea	Odontoceti	Ziphiidae	Mesoplodon	densirostris	The Charleston Museum	ChM CM434		https://sketchfab.com/3d-models/chm-cm434-blainvilles-beaked-whale-skull-e6fb1be8b7c24a8e94ced2ca31202768
Cetacea	Odontoceti	Ziphiidae	Mesoplodon	mirus	National Museum of Natural History	USNM 571357		https://www.phenome10k.org/mesoplodon-mirus-2/
Cetacea	Odontoceti	Ziphiidae	Mesoplodon	perrini	Natural Histroy Museum, Los Angeles	LACM 97501		https://www.phenome10k.org/mesoplodon-perrini/
Cetacea	Odontoceti	Ziphiidae	Mesoplodon	bowdoini	South Australian Museum	SAMA_M22559		https://www.morphosource.org/concern/parent/000599416/media/000599420
Cetacea	Odontoceti	Ziphiidae	Mesoplodon	hectori	South Australian Museum	SAM_M26434		https://www.morphosource.org/concern/parent/000599425/media/000599427
Cetacea	Odontoceti	Ziphiidae	Mesoplodon	europaeus	National Museum of Natural History	USNM 504256		https://www.phenome10k.org/mesoplodon-europaeus/
Cetacea	Odontoceti	Ziphiidae	Tasmacetus	shepherdi	National Museum of Natural History	USNM 484878		https://www.phenome10k.org/tasmacetus-shepherdi
Cetacea	Odontoceti	Ziphiidae	Ziphius	cavirostris	Natural History Museum, London	NHMUK 1915.7.20.1		https://sketchfab.com/3d-models/cuviers-beaked-whale-cranium-8576b02cab734b228a3613a3b0034828
3D model used for Fig. 1
Clade1	Clade2	Family	Genus	Species	Institution	Specimen#		URL
Cetacea	Mysticeti	Balaenidae	Balaena	mysticetus	University of Alaska, Museum of the North	UAM-15988	skull	https://www.morphosource.org/concern/media/000123971?locale=en
							mandible	https://www.morphosource.org/concern/media/000124060?locale=en
